# Supplementary material for: Ultrafast Förster resonance energy transfer between tyrosine and tryptophan: potential contributions to protein–water dynamics measurements
Source: Royal Society of Chemistry journal article supplement (doi:10.1039/d2cp02139k), 2022-01-01
Supplement: d2cp02139k1.pdf [file d2cp02139k1.pdf]

## Supplementary Information

### Ultrafast Förster Resonance Energy Transfer between Tyrosine and Tryptophan: Potential Contributions to Protein-Water Dynamics Measurements

Haoyang Li<sup>†</sup>, Guanyu Jiang<sup>†</sup>, Menghui Jia<sup>†</sup>, Simin Cao<sup>†</sup>, Sanjun Zhang<sup>†</sup>, Jinquan Chen<sup>†</sup>, Haitao Sun<sup>†</sup>, Jianhua Xu<sup>\*,†,‡</sup>, and Jay R. Knutson<sup>\*,‡</sup>

<sup>†</sup> State Key Laboratory of Precision Spectroscopy, East China Normal University, Shanghai 200062, China

<sup>‡</sup> Laboratory of Advanced Microscopy & Biophotonics, National Heart, Lung and Blood Institute, National Institutes of Health, Bethesda, Maryland 20892, United States

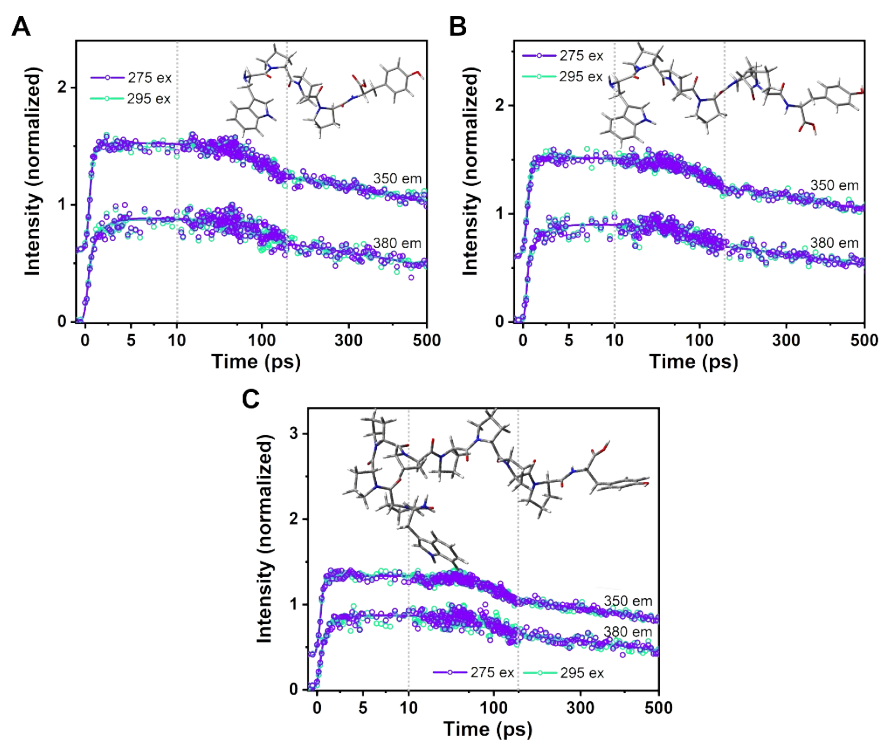

Figure S1. Normalized up-conversion fluorescence decay of WP3Y (A), WP5Y (B) and WP8Y (C) gated from typical emission wavelengths with excitation wavelength 275 nm and 295 nm.

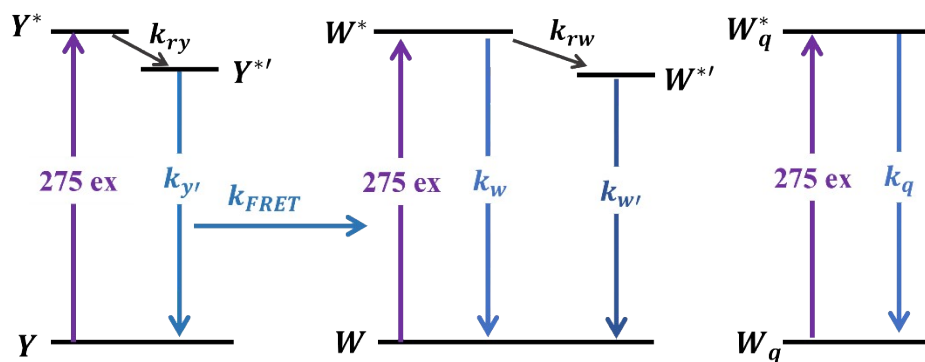

Figure S2. Simplified energy level structure diagrams of FRET, QSSQ and other components.

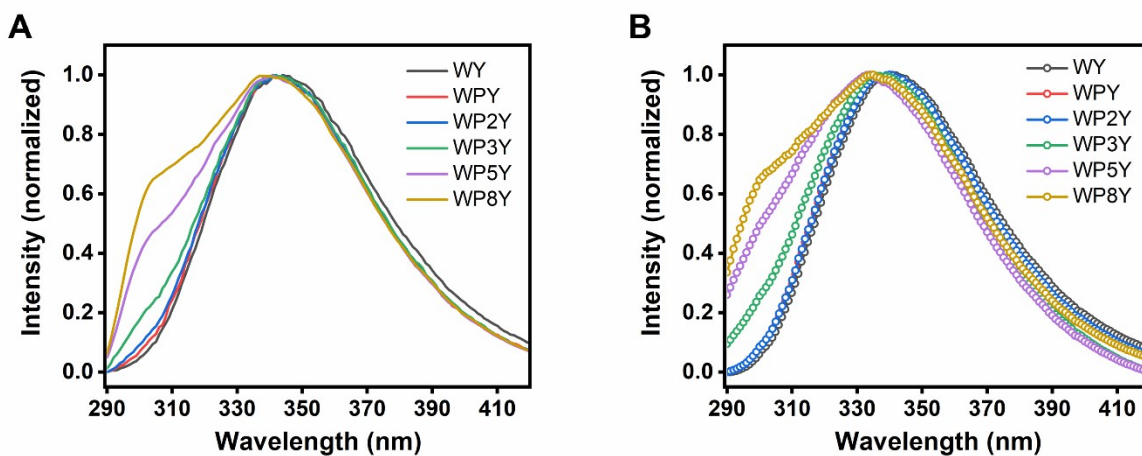

Figure S3. The fluorescence spectra (A) of all peptides excited at 275 nm and the spectra (B) calculated by the working model.

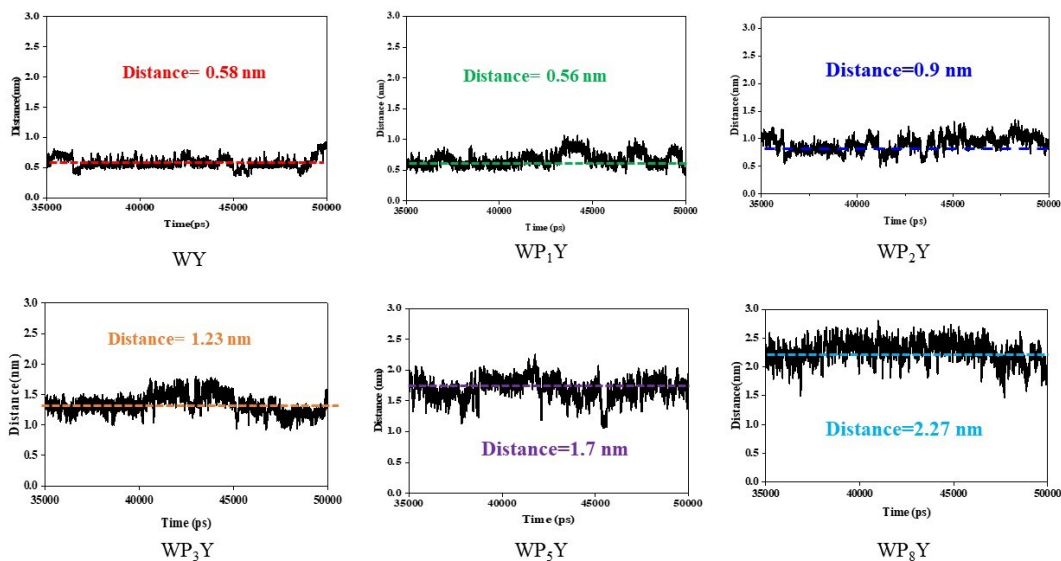

Figure S4. The counted centroid distance between fragments F1 and F3 for WPnY. Sampling was performed after the systems reach equilibrium. And trajectories of the last 15-ns were counted.

Table S1. Details of all parameters used in the working model.

|      | $k_y$<br>( $ns^{-1}$ ) | $k_{FRET}$<br>( $ns^{-1}$ ) | $k_w$<br>( $ns^{-1}$ ) | $k_{rw}$<br>( $ns^{-1}$ ) | $k_{w'}$<br>( $ns^{-1}$ ) | $k_Q$<br>( $ns^{-1}$ ) | $a$ | $b$ |
|------|------------------------|-----------------------------|------------------------|---------------------------|---------------------------|------------------------|-----|-----|
| WY   | 0.3                    | 50                          | 0.25                   | 500                       | 0.5                       | 6.2                    | 0.6 | 0.4 |
| WPY  | 0.3                    | 200                         | 0.25                   | 500                       | 0.5                       | 10                     | 0.5 | 0.5 |
| WP2Y | 0.3                    | 20                          | 0.25                   | 500                       | 0.5                       | 5.8                    | 0.5 | 0.5 |
| WP3Y | 0.3                    | 2                           | 0.25                   | 500                       | 0.5                       | 8.0                    | 0.7 | 0.3 |
| WP5Y | 0.3                    | 0.5                         | 0.25                   | 500                       | 0.5                       | 8.0                    | 0.5 | 0.5 |
| WP8Y | 0.3                    | 0.02                        | 0.25                   | 500                       | 0.5                       | 8.0                    | 0.5 | 0.5 |

Table S2. The fragment transition dipole moments of WP<sub>n</sub>Y(n=0,1,2,3) based on the optimized structure.

|             | <b>vector</b>   | <b>x</b> | <b>y</b> | <b>z</b> |
|-------------|-----------------|----------|----------|----------|
| <b>WY</b>   | $\mu_A$ (a.u.)  | -0.4605  | 0.6145   | -0.0916  |
|             | $R_{DA}$ (a.u.) | 9.5547   | 0.3255   | 0.2591   |
|             | $\mu_D$ (a.u.)  | -0.0196  | -0.0124  | 0.0007   |
| <b>WPY</b>  | $\mu_A$ (a.u.)  | 0.5172   | 0.0783   | 0.1591   |
|             | $R_{DA}$ (a.u.) | 9.1006   | 2.3978   | -0.4921  |
|             | $\mu_D$ (a.u.)  | 0.0224   | 0.0007   | 0.0041   |
| <b>WP2Y</b> | $\mu_A$ (a.u.)  | 0.5963   | -0.2139  | -0.6838  |
|             | $R_{DA}$ (a.u.) | 12.2504  | -0.4265  | 0.0796   |
|             | $\mu_D$ (a.u.)  | 0.0075   | 0.0014   | -0.0008  |
| <b>WP3Y</b> | $\mu_A$ (a.u.)  | -0.5711  | 0.2409   | 0.31     |
|             | $R_{DA}$ (a.u.) | -15.9246 | -2.722   | 0.048    |
|             | $\mu_D$ (a.u.)  | -0.0095  | -0.0012  | -0.0034  |

### Calculation details of $R_0$

The calculation formula is as follows,

$$\left\{ \begin{array}{l} R_0^6 = \frac{9000(\ln 10)\kappa^2 Q_D}{128\pi^5 N n^4} J(\lambda) \\ J(\lambda) = \frac{\int_0^\infty F_D(\lambda) \varepsilon_A(\lambda) \lambda^4 d\lambda}{\int_0^\infty F_D(\lambda) d\lambda} \end{array} \right.$$

$Q_D$  is the quantum yield of the PY. We calculated  $Q_D = 0.14$  from the absorption and emission data (concentration gradient) of PY. N is Avogadro's number. n is the refractive index of the

medium and typically assumed to be 1.4 for biomolecules in aqueous solution.  $\kappa^2$  is a factor describing the relative orientation in space of the transition dipoles of the donor and acceptor. It is usually assumed to be equal to 2/3.  $F_D(\lambda)$  is the fluorescence emission of PY.  $\varepsilon_A(\lambda)$  is the extinction coefficient of WP. According to this formula, we calculate  $J(\lambda) = 6.86874 \times 10^{-16} \text{ cm}^6$ ;  $R_0 = 15.646 \text{ \AA}$ .

In addition, we put the PY emission and WP absorption spectra on one graph below.

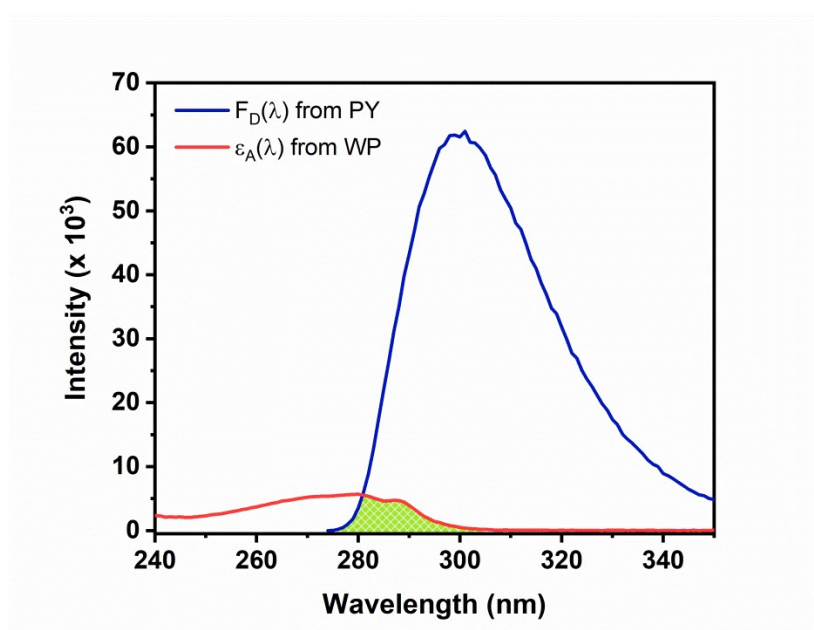

Figure S5. PY emission and WP absorption spectra overlap. Overlapping areas are marked in green.
